# Supplementary material
Source: publisher figshare collection journal article supplement (https://springernature.figshare.com/ndownloader/files/13723409)
Supplement: Supplementary file 1 [file 13723409]

hsa-miR-183-96-182

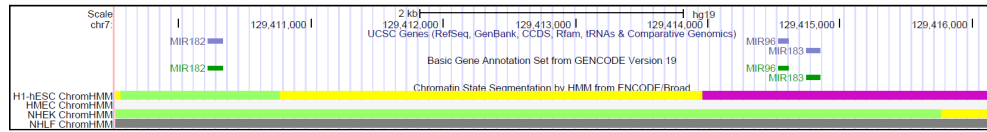

hsa-miR-200c

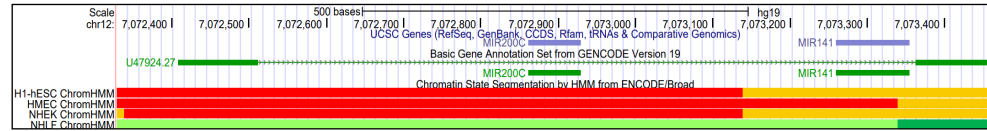

hsa-miR-138-1

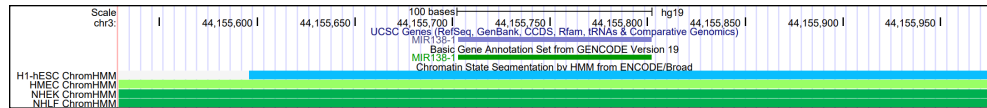

hsa-miR-1469

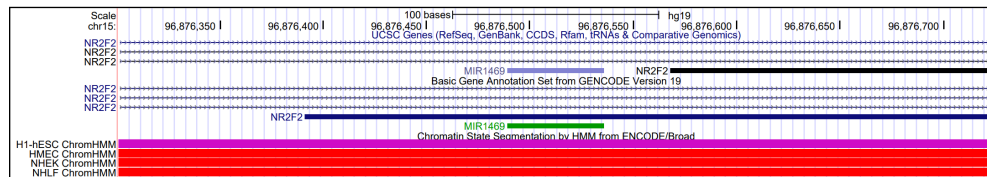

hsa-miR-1915

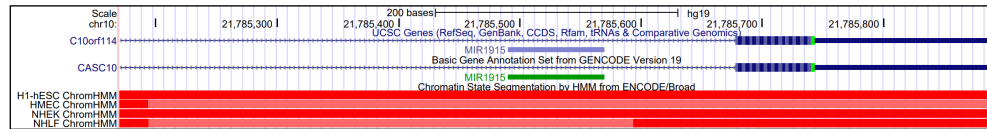

hsa-miR-194-1

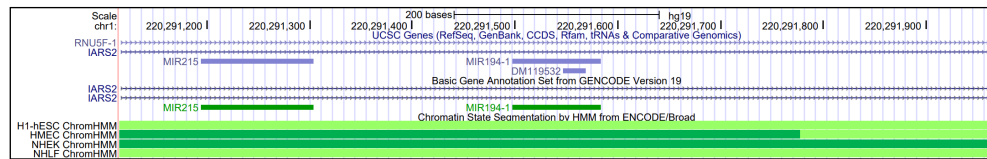

hsa-miR-200a

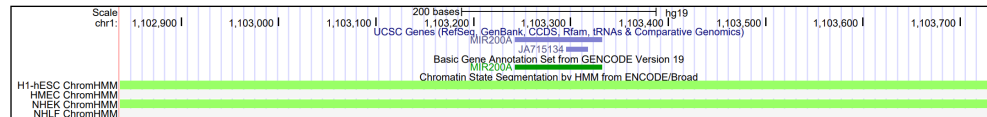

hsa-miR-29a

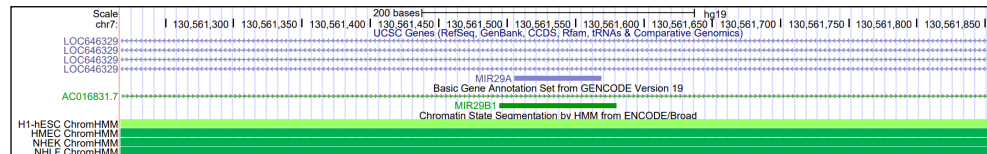

hsa-miR-301a

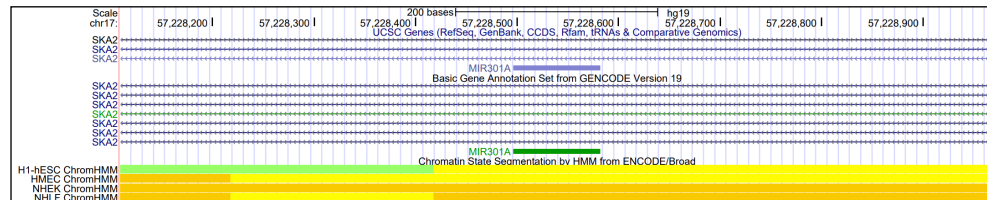

hsa-miR-301b

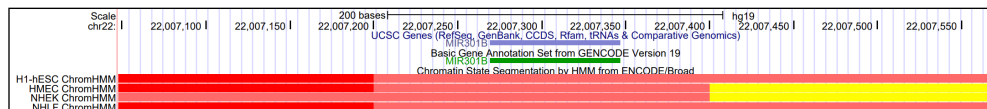

hsa-miR-3178

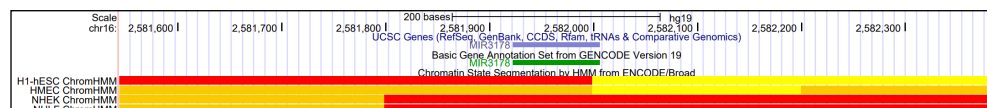

Figure S2 Handa et al.
