# Supplementary material
Source: publisher figshare collection journal article supplement (https://springernature.figshare.com/ndownloader/files/13723409)

hsa-miR-4745

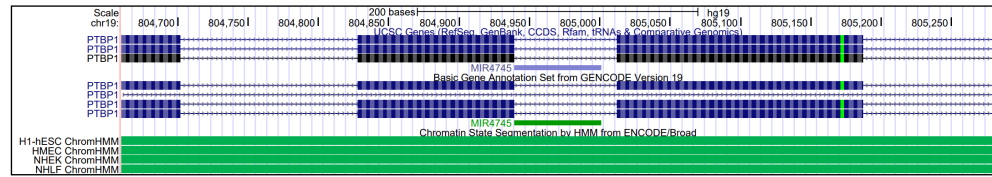

hsa-miR-503

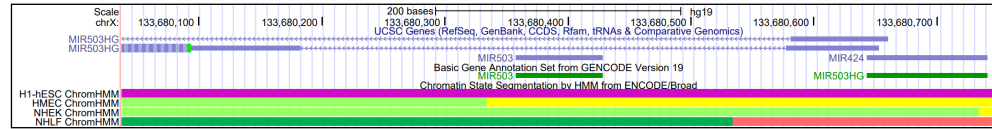

hsa-miR-642

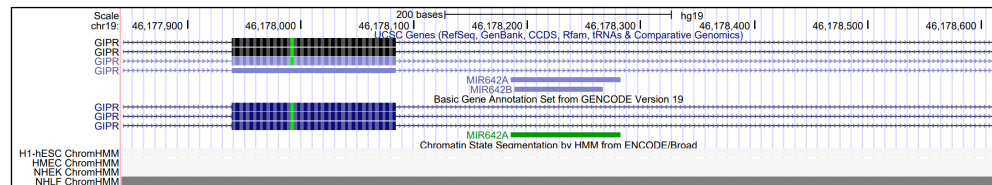

hsa-miR-663

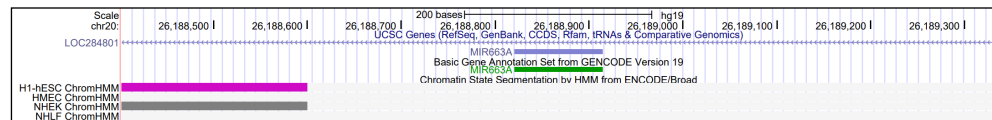

hsa-miR-769

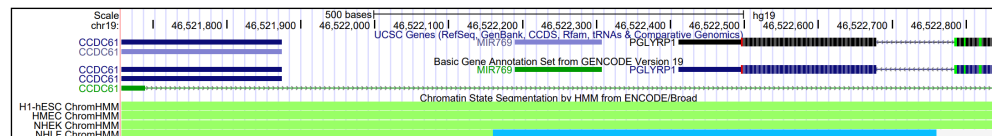

Figure S2 Handa et al.

Supplement: Supplementary file 2 [file 13723409]

hsa-miR-330

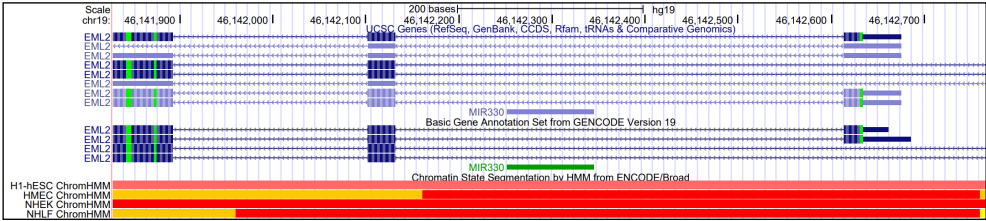

hsa-miR-345

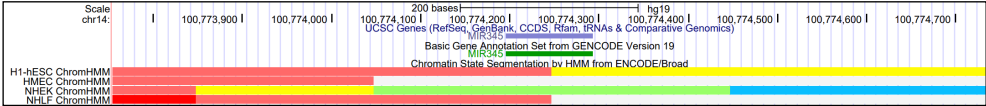

hsa-miR-3665

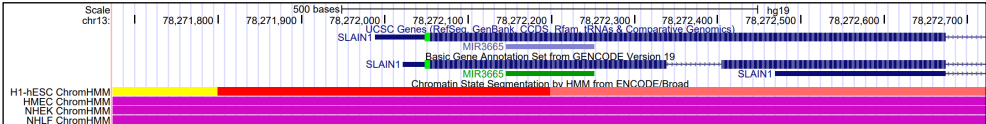

hsa-miR-423

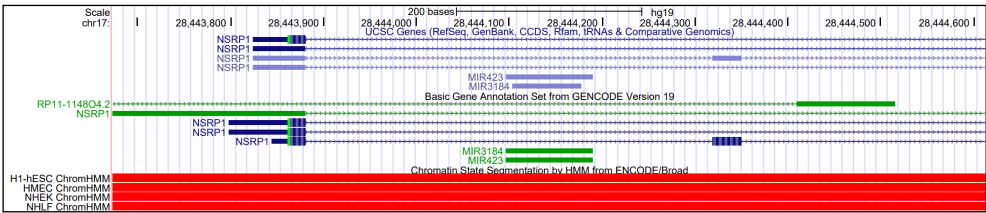

hsa-miR-424

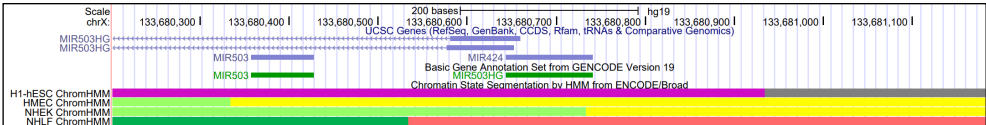

hsa-miR-4289

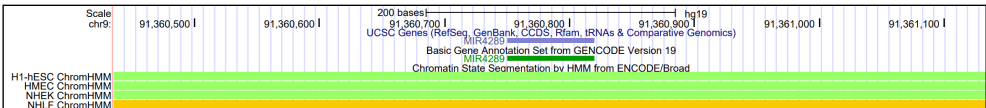

hsa-miR-4466

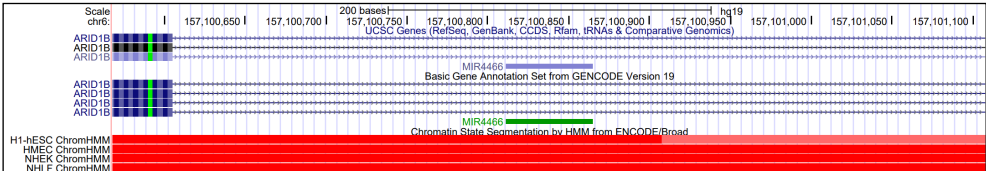

hsa-miR-4478

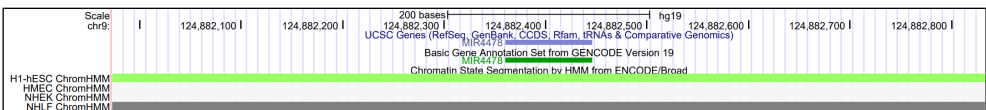

hsa-miR-4530

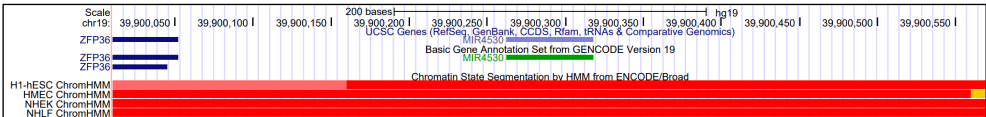

hsa-miR-4730

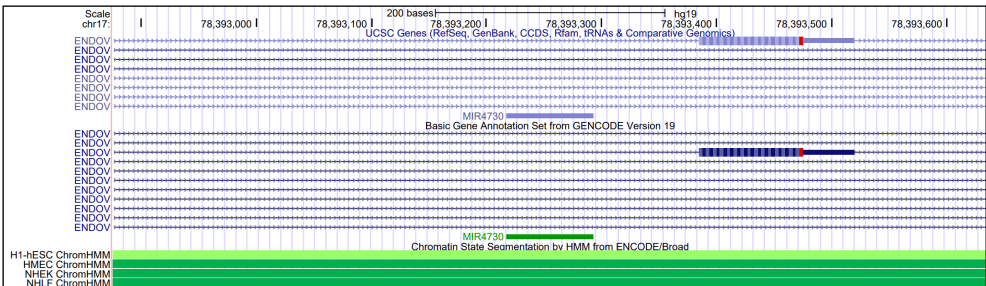

Figure S2 Handa et al.

Supplement: Supplementary file 3 [file 13723409]
